# Supplementary material for: Separation and identification of an impurity from the istradefylline intermediate
Source: Royal Society of Chemistry journal article supplement (doi:10.1039/c9ra09074f), 2020-01-01
Supplement: c9ra09074f1.pdf [file c9ra09074f1.pdf]

## Seperation and identification of an impurity from Istradefylline intermediate

Haojie Xu<sup>a,b</sup>, Yiyun Wang<sup>a,b</sup>, Hongyi Wang<sup>a,b</sup>, Zhonghui Zheng<sup>b</sup>, Zihui Meng<sup>\*,a</sup>, Min Xue<sup>a</sup>, Zhibin Xu<sup>a</sup>

<sup>a</sup> School of Chemistry and Chemical Engineering, Beijing Institute of Technology, 102488, Beijing, China.

<sup>b</sup> Shandong Xinhua Pharmaceutical Co., Ltd., No.1 Lutai avenue, 255086, ZiBo, Shandong, China.

### Section 1 Synthesis of Intermediate A<sub>1</sub>

1,3-Diethylurea ( 1.4 g, 12mmol ) and 2-cyanoacetic acid ( 1.2 g, 14mmol ) were added to a solution of acetic anhydride ( 10ml ). The reaction mixture was stirred at 90~95 °C for 1.0 h. After confirming that the reaction was complete by TLC analysis, the reddish brown oily solution was collected by concentration under reduced pressure. Purified water ( 10 ml ) was added to the solution at ambient temperature, adjusting to pH 14 with 40% NaOH solution, and the reaction mixture was stirred at 90~95 °C for 15 min. The white precipitate was collected by filtration and dried to give the titled compound.

### Section 2.2 HPLC analysis of impurity

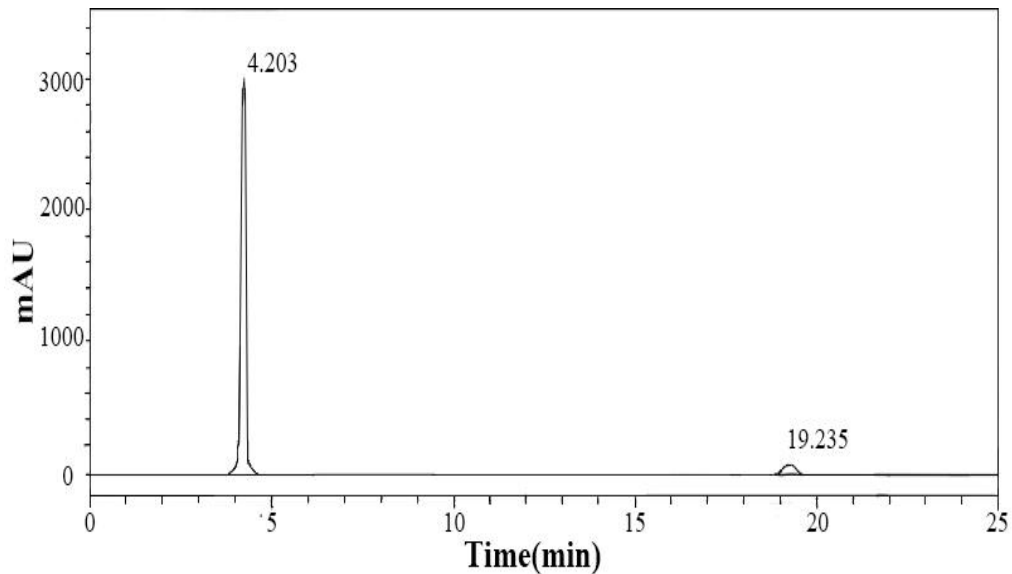

Fig.S1. HPLC analysis of impurity

**Section 3.2** The spectroscopic data such  $^1\text{H}$  NMR,  $^{13}\text{C}$  NMR, IR and proton correlation spectroscopy (COSY, HMQC and HMQC) was recorded for impurity in Istradefylline intermediate  $A_1$ .

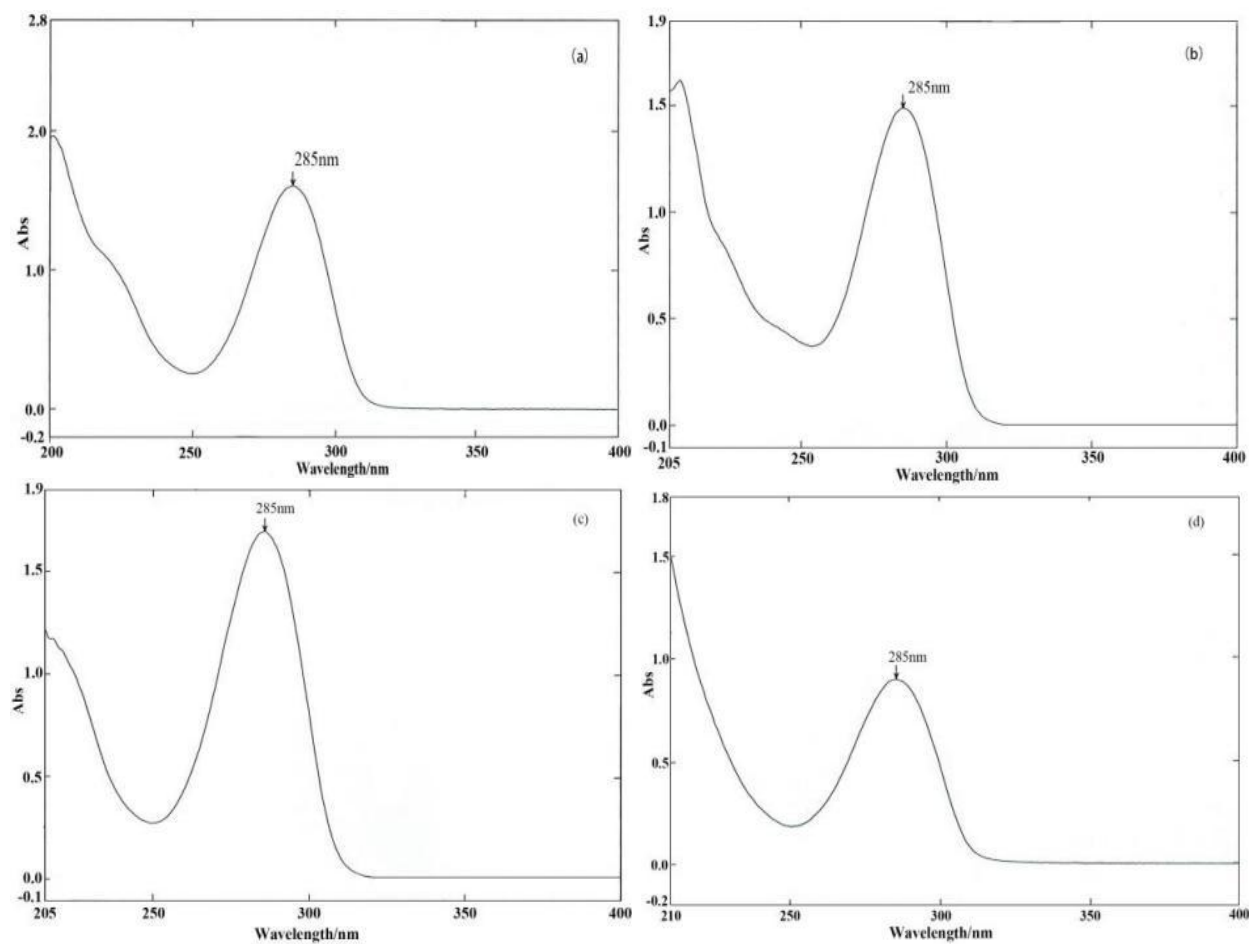

**Fig.S2.** UV absorption spectrum in (a)  $\text{H}_2\text{O}$ , (b) HCl solution ( $0.1 \text{ mol L}^{-1}$ ), (c) NaOH solution ( $0.1 \text{ mol L}^{-1}$ ) and (d) methanol solution

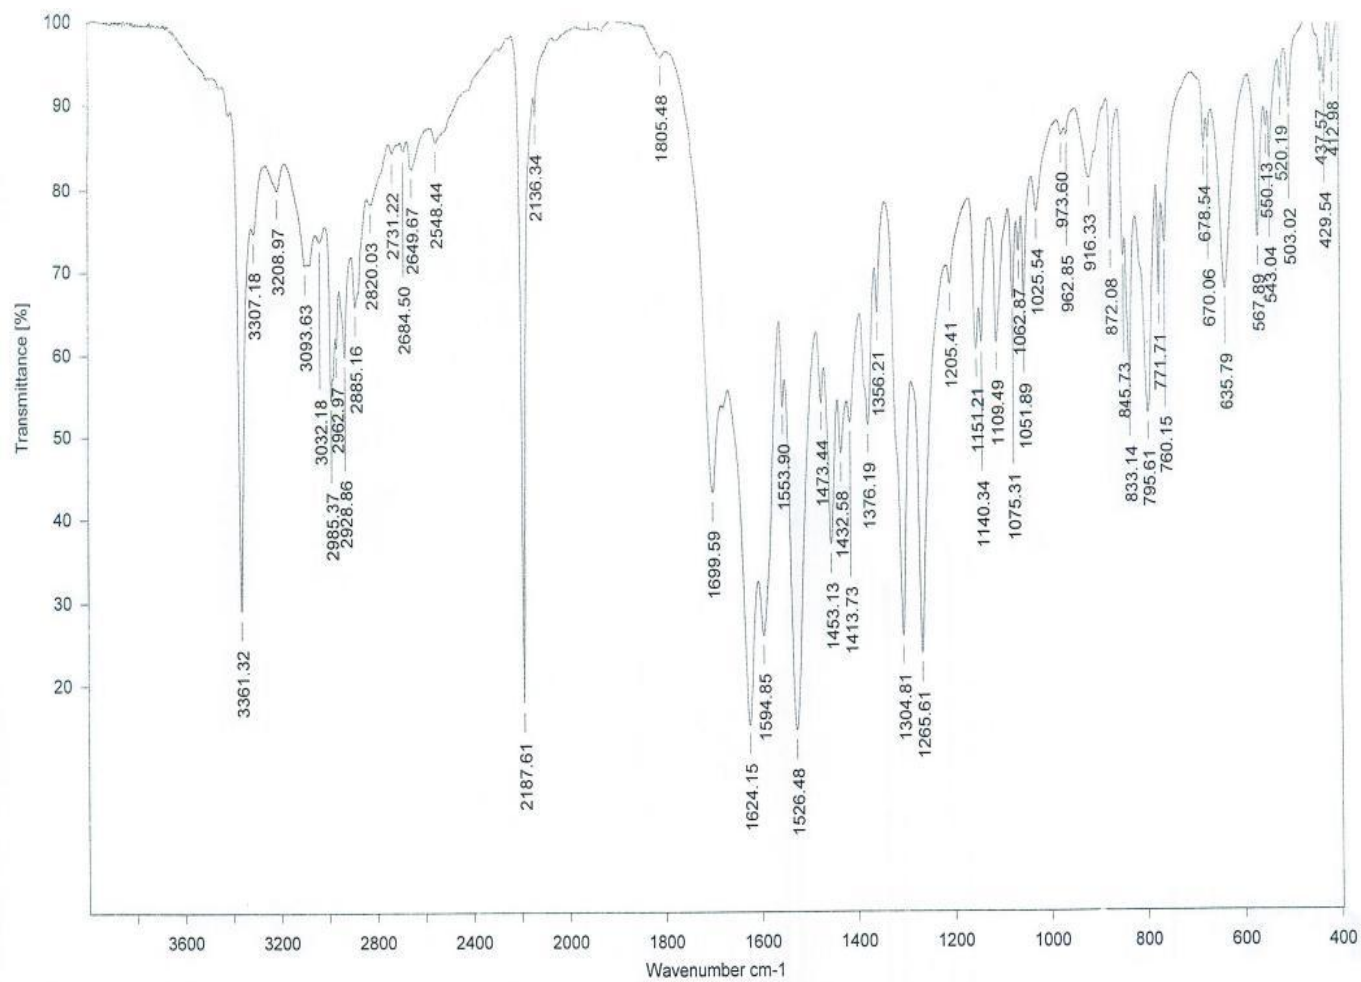

Fig.S3. IR absorption spectrum of impurity

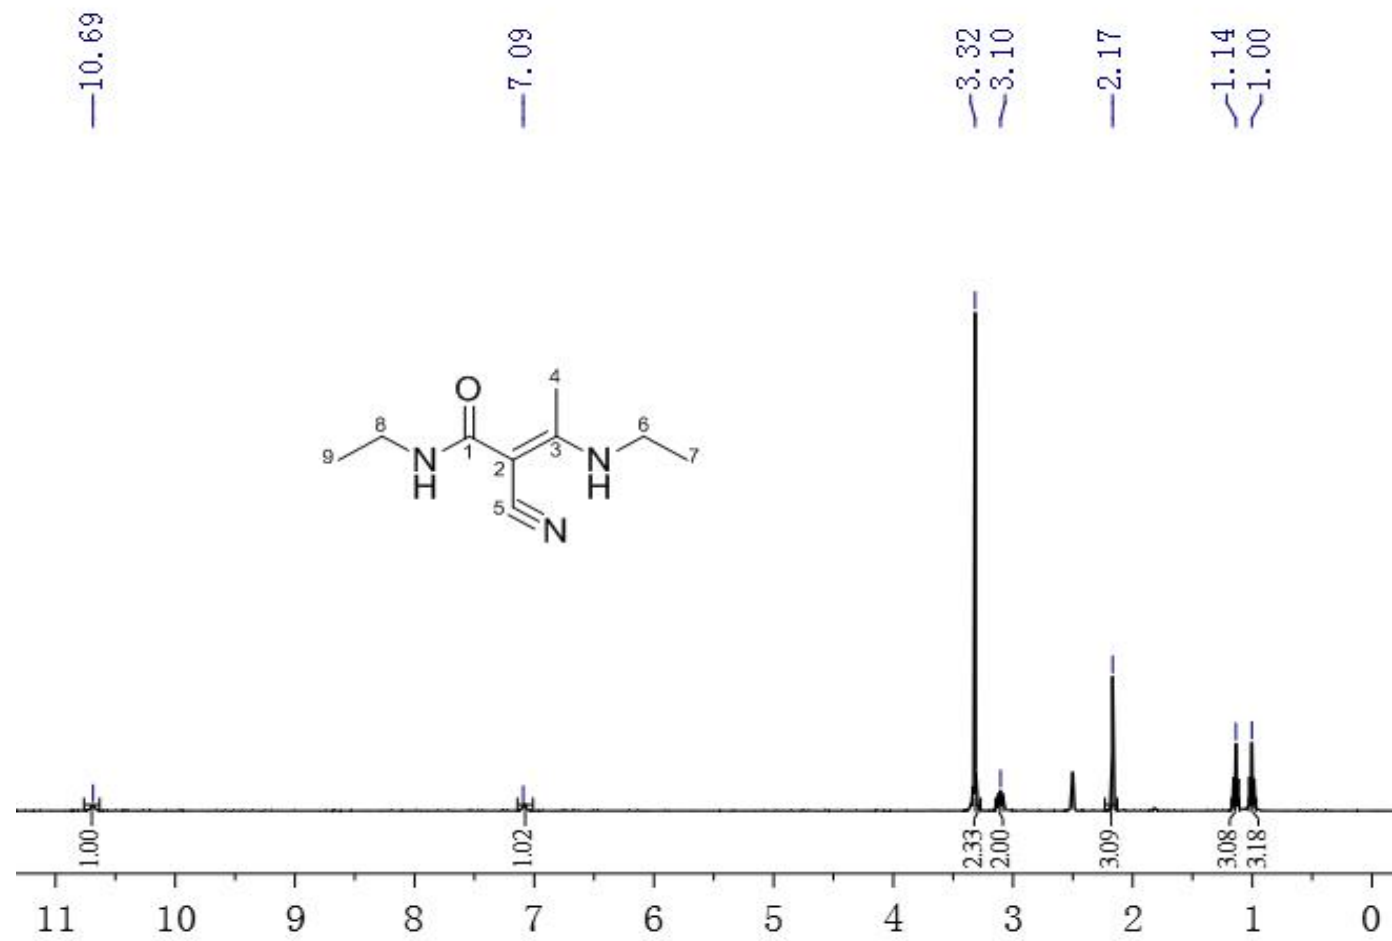

Fig.S4.  $^1\text{H}$  NMR spectrum of impurity

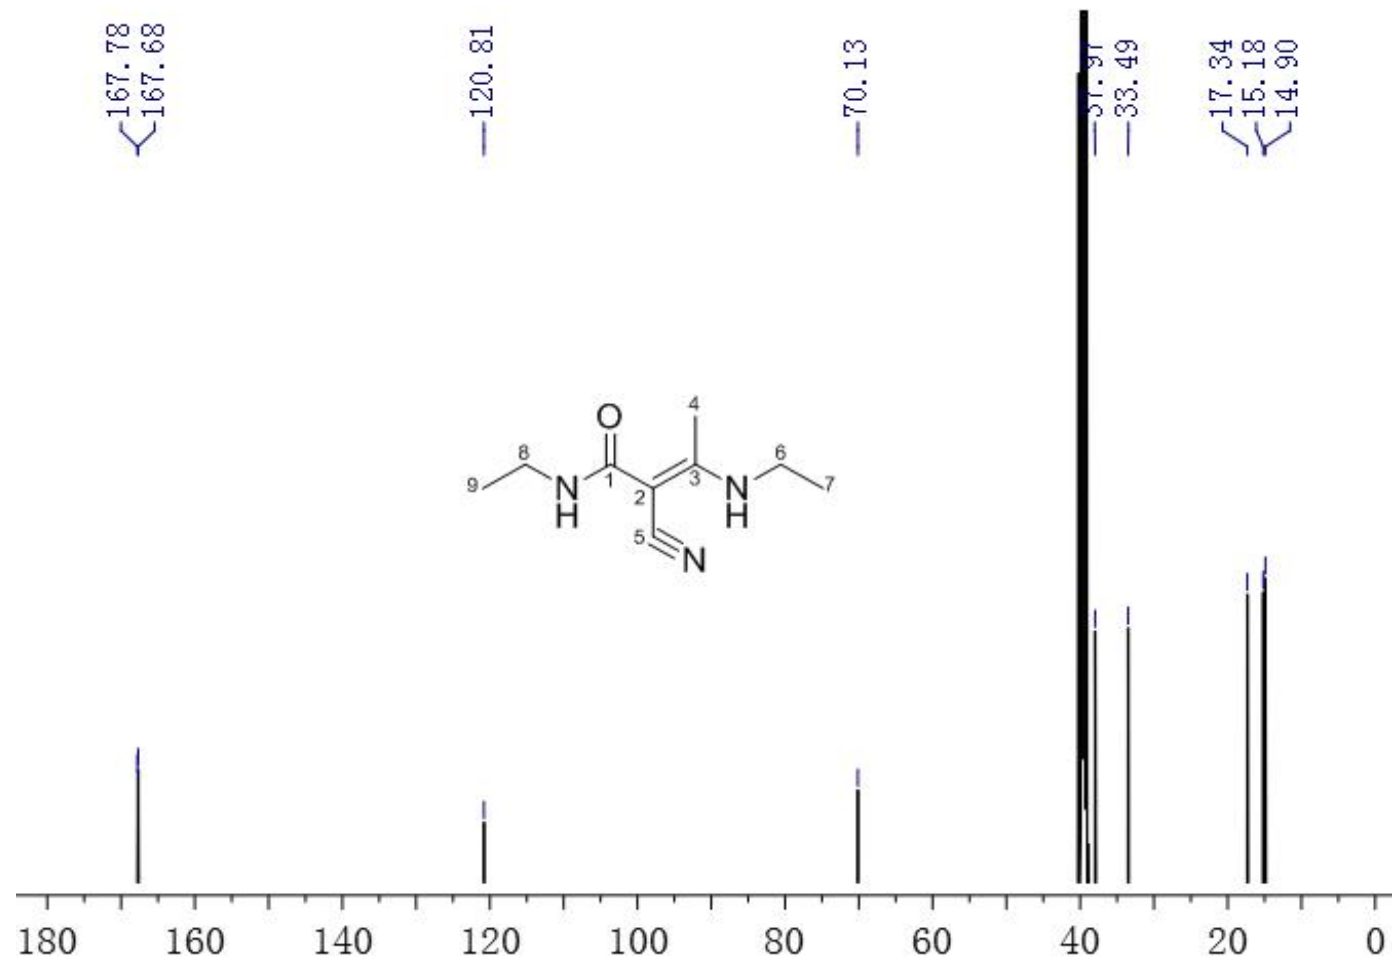

**Fig.S5.**  $^{13}\text{C}$  NMR spectrum of impurity

|               |                |             |                      |                 |              |                        |                      |
|---------------|----------------|-------------|----------------------|-----------------|--------------|------------------------|----------------------|
| Sample Name   | W170297-0001   | Position    | P1-C6                | Instrument Name | Instrument 1 | User Name              |                      |
| Inj Vol       | 1              | InjPosition |                      | SampleType      | Sample       | IRM Calibration Status | Success              |
| Data Filename | W170297-0001.d | ACQ Method  | wss-isocratic elutio | Comment         |              | Acquired Time          | 2/24/2017 3:14:15 PM |

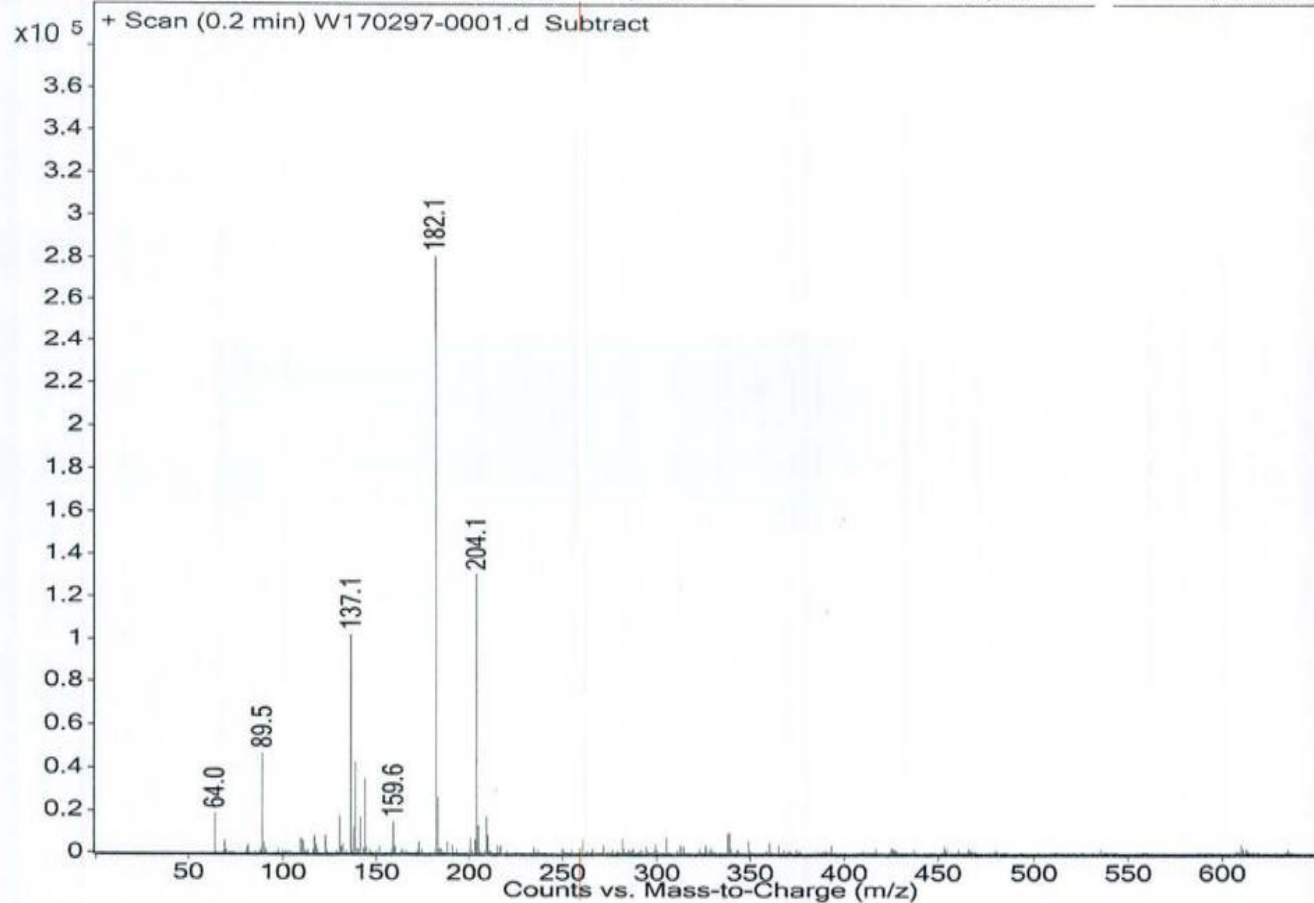

Fig.S6. ESI mass spectrum of impurity

DEPT135 YQCJZZ in DMSO

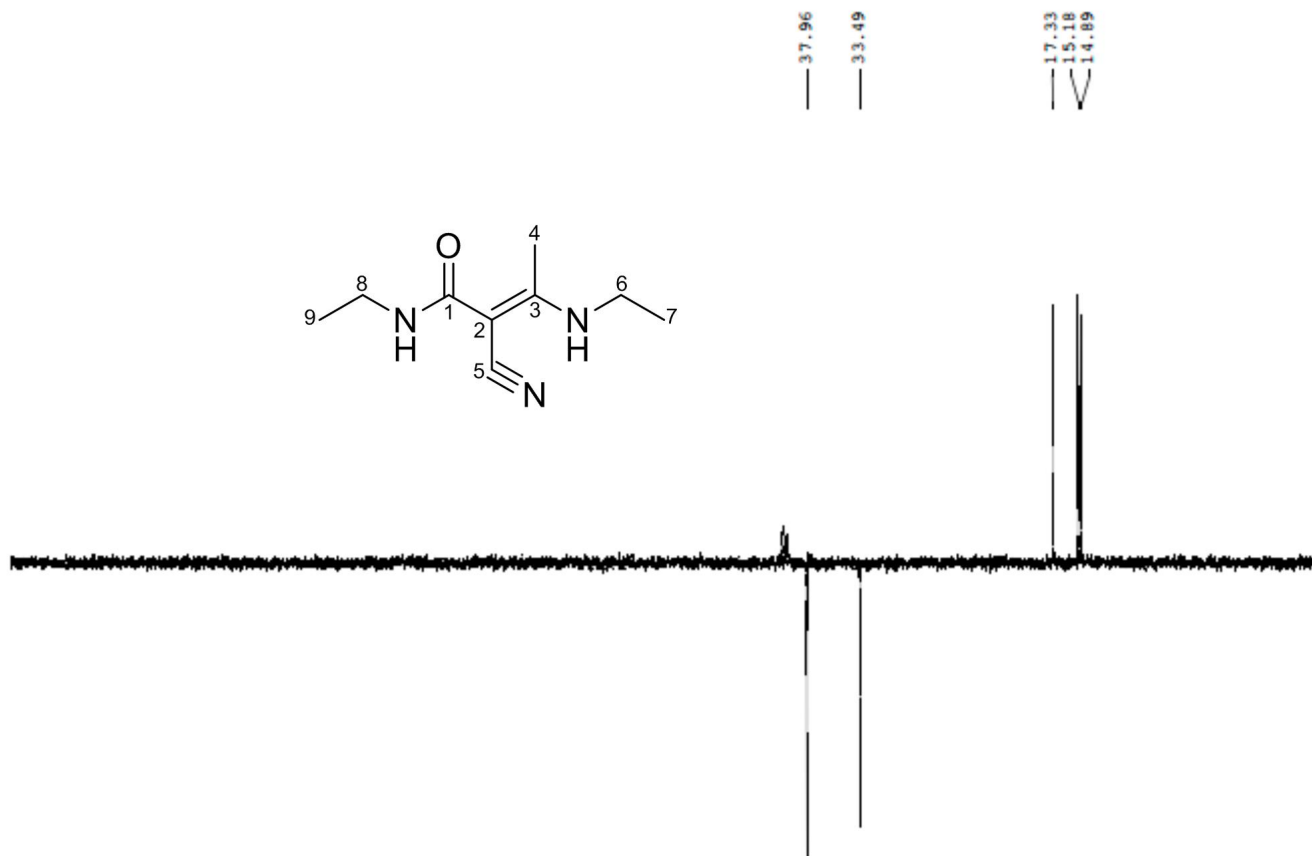

Fig.S7. DEPT spectrum

COSY YQCJZZ in DMSO

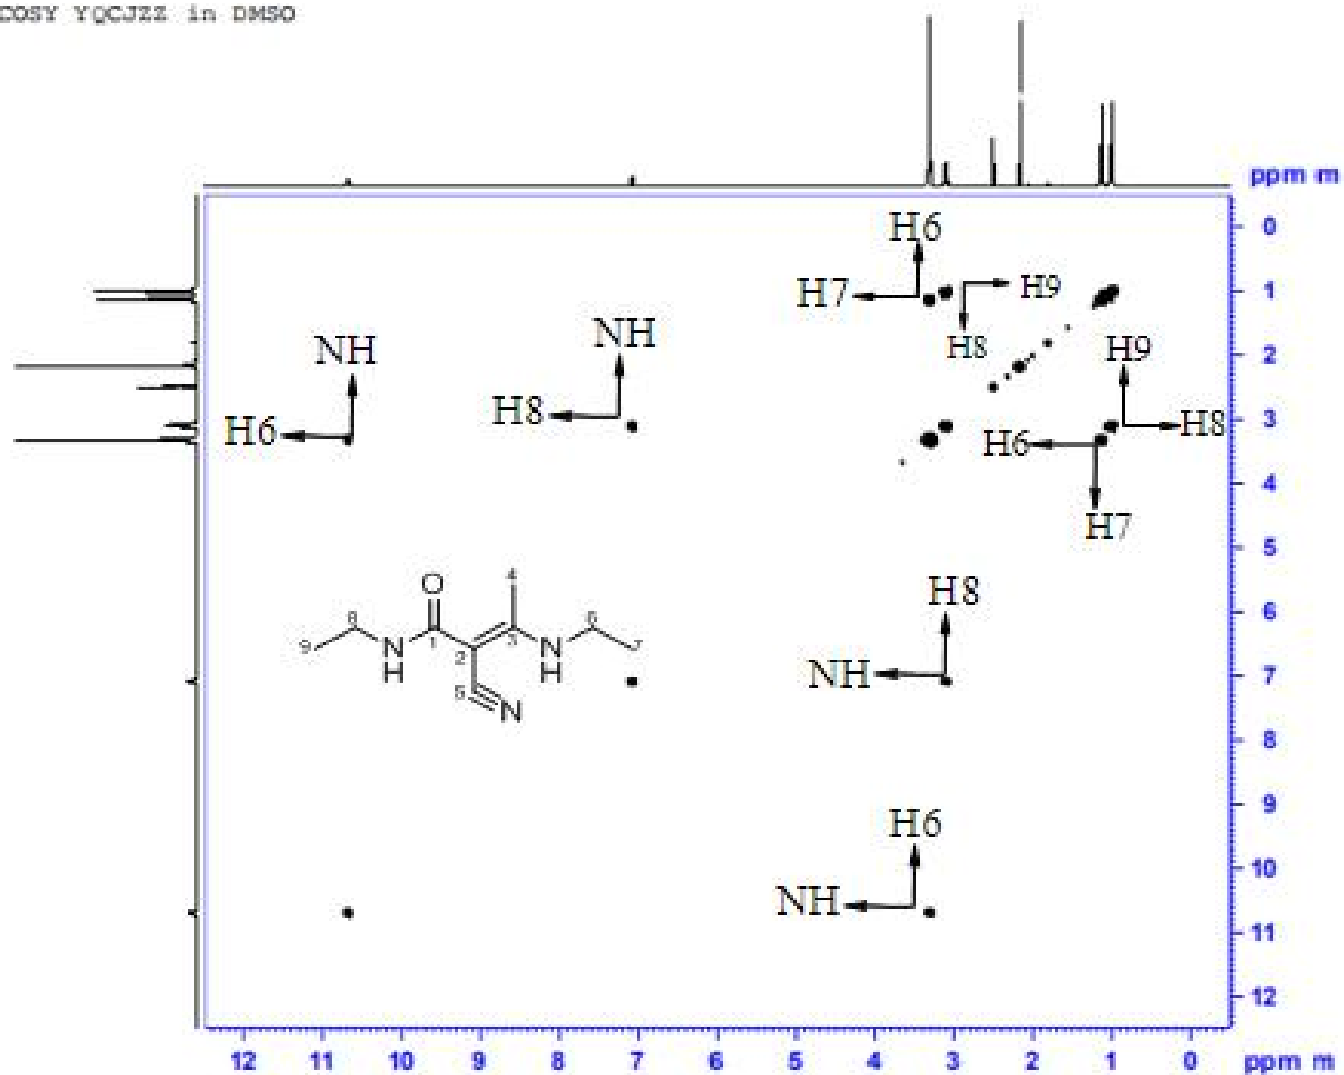

Fig.S8.  $^1\text{H}$ - $^1\text{H}$  COSY correlation spectrum



HSQC YQCJZE in DMSO

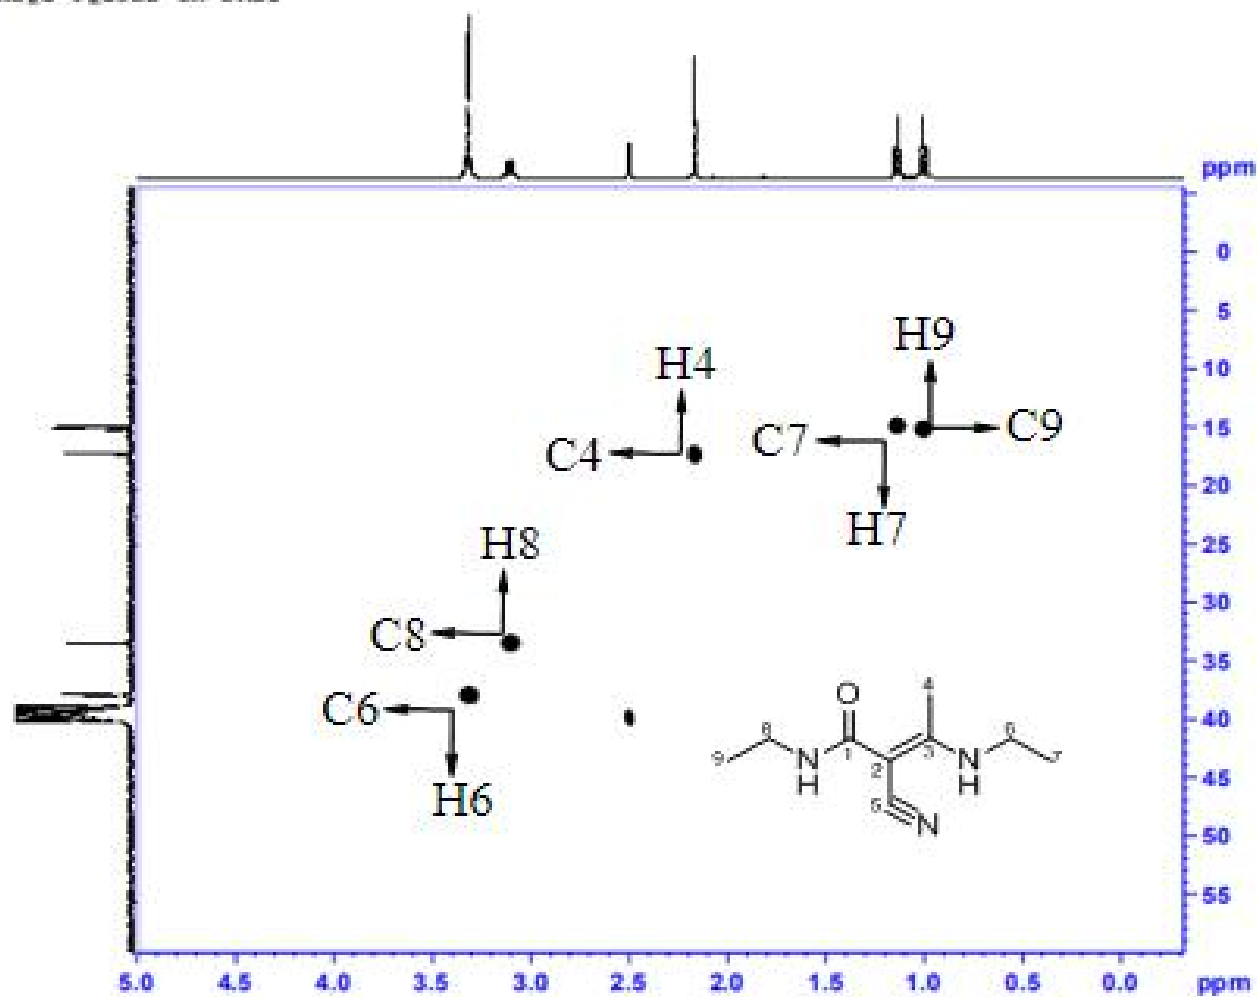

Fig.S9.  $^{13}\text{C}$ - $^1\text{H}$ HSQC correlation spectrum

HMBC YQCJZZ in DMSO

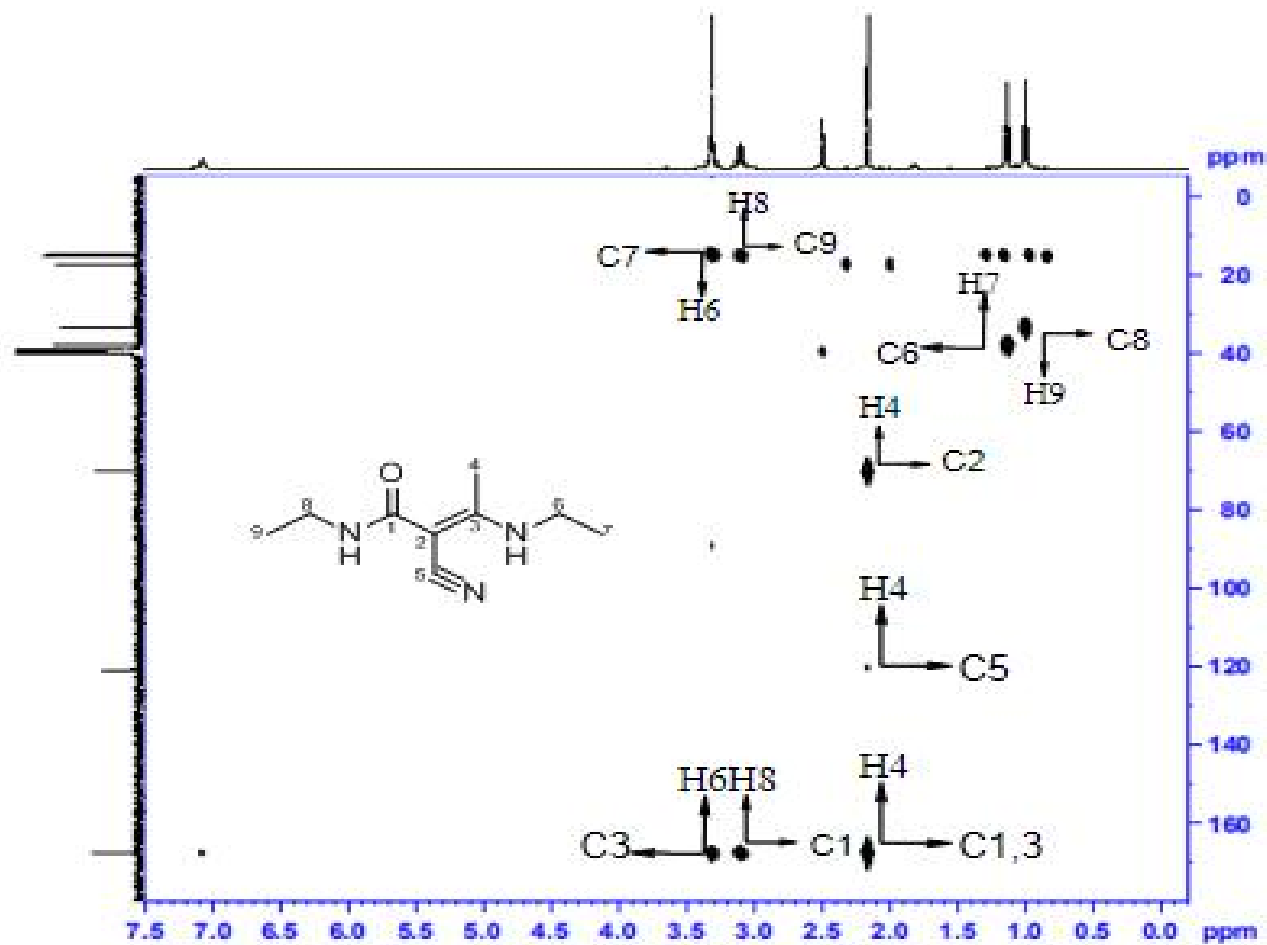

Fig.S10. The remote  $^{13}\text{C}$ - $^1\text{H}$  HMBC correlation spectrum

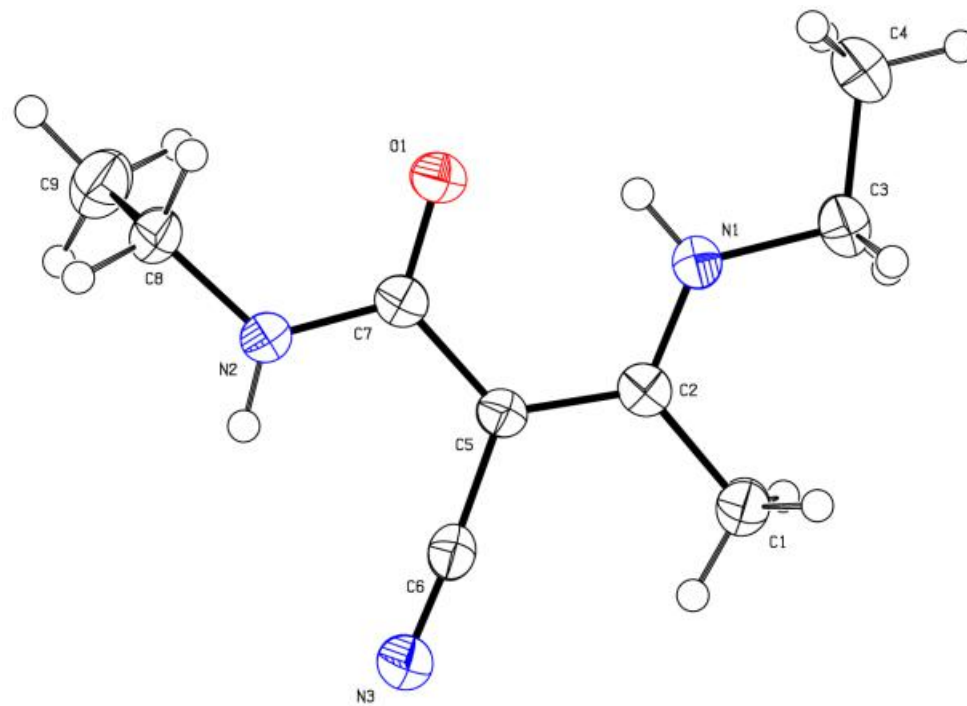

**Fig.S11.** Single crystal X-ray diffractometer spectrum
